# Supplementary material for: Plasticizing and crosslinking effects of borate additives on the structure and properties of poly(vinyl acetate)
Source: Royal Society of Chemistry journal article supplement (doi:10.1039/c6ra28574k), 2017-01-01
Supplement: c6ra28574k1.pdf [file c6ra28574k1.pdf]

Supplementary information for:

# Plasticizing and crosslinking effects of borate additives on the structure and properties of poly(vinyl acetate)

*Shiyu Geng,<sup>a</sup> Faiz Ullah Shah,<sup>b</sup> Peng Liu,<sup>a</sup> Oleg N. Antzutkin,<sup>b,c</sup> and Kristiina Oksman<sup>\*a,d</sup>*

<sup>a</sup>Division of Materials Science, Department of Engineering Sciences and Mathematics, Luleå

University of Technology, SE-971 87, Luleå, Sweden

<sup>b</sup>Chemistry of Interfaces, Luleå University of Technology, SE-97187 Luleå, Sweden

<sup>c</sup>Department of Physics, University of Warwick, Coventry, UK

<sup>d</sup>Fibre and Particle Engineering, University of Oulu, Finland

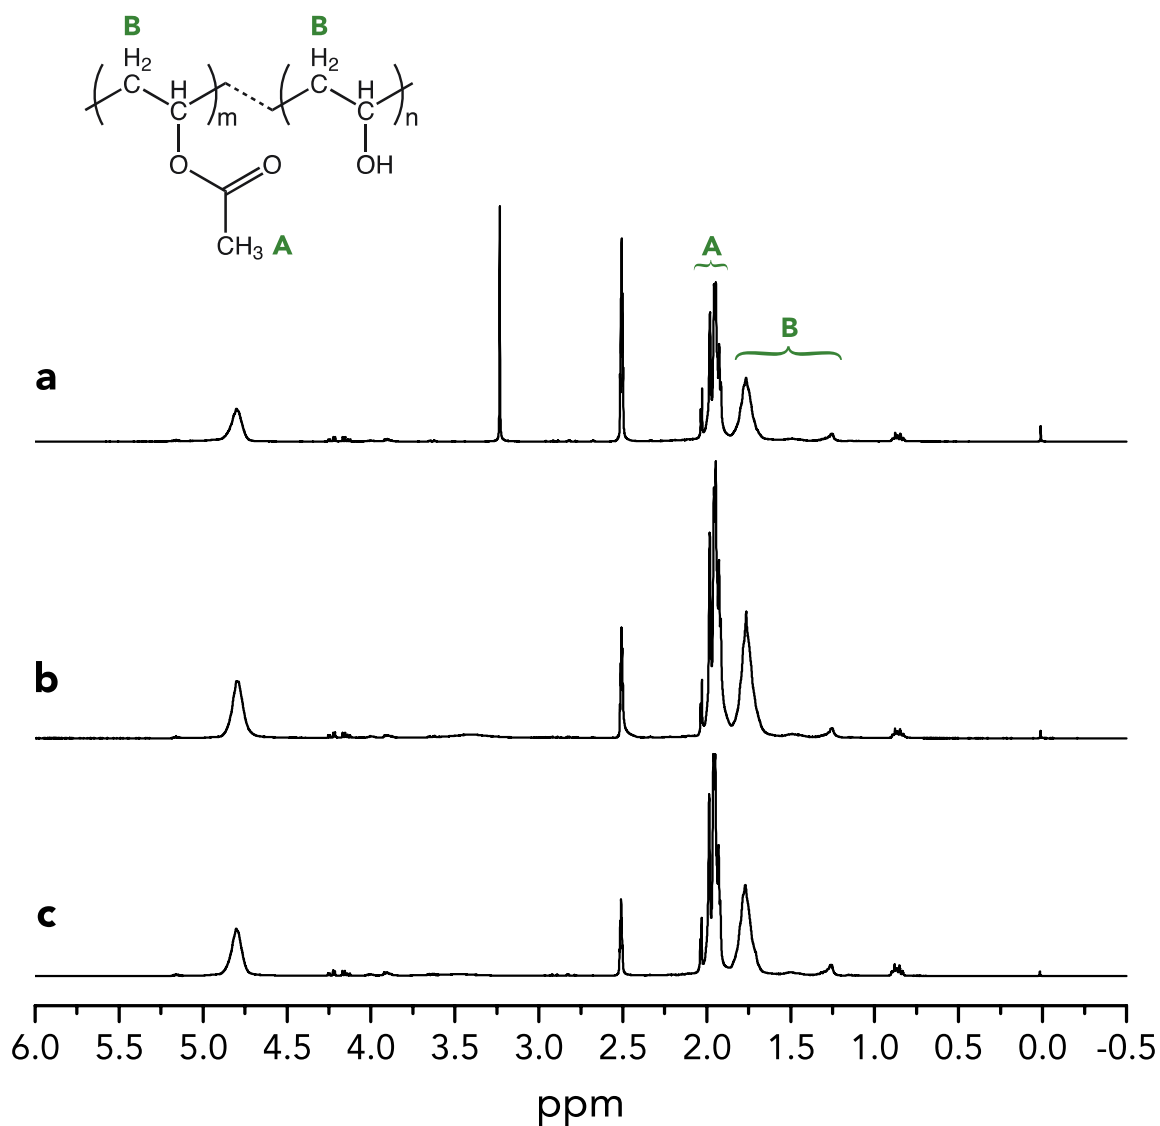

**Fig. S1** 400.21 MHz  $^1\text{H}$  NMR spectra of PVAc-4 (a), PVAc-9.3 (b) and PVAc-11 (c) dissolved in  $\text{DMSO-}d_6$  at 40 °C. Resonance lines in the ranges A and B were assigned to the acetate protons and the methylene protons, respectively, in the partially hydrolyzed PVAc. The hydrolysis degrees of the samples were calculated according to the equation:

$$\text{Hydrolysis degree (\%)} = 100 - \frac{\text{acetate protons (A)}}{3} \bigg/ \frac{\text{methylene protons (B)}}{2}$$

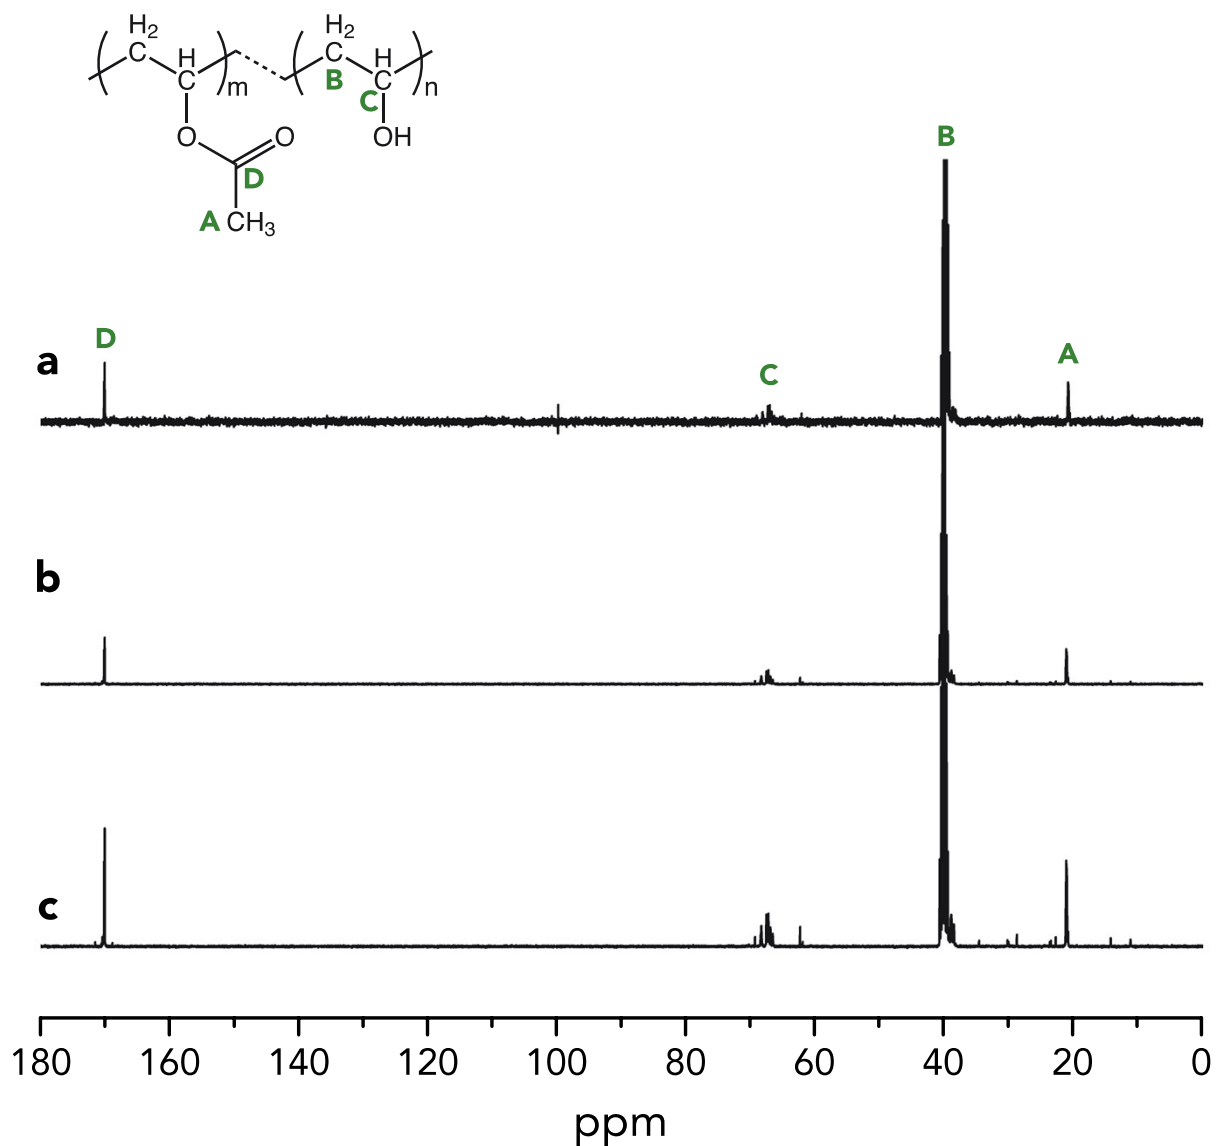

**Fig. S2** 100.64 MHz  $^{13}\text{C}$  NMR spectra of PVAc-4 (**a**), PVAc-9.3 (**b**) and PVAc-11 (**c**) dissolved in  $\text{DMSO-}d_6$  at 40 °C. Resonance lines of  $-\text{CH}_3$ ,  $-\text{CH}_2$ ,  $-\text{CHO}$  and  $-\text{COO}$  carbons in the partially hydrolyzed PVAc are located in the positions A, B, C and D, respectively.

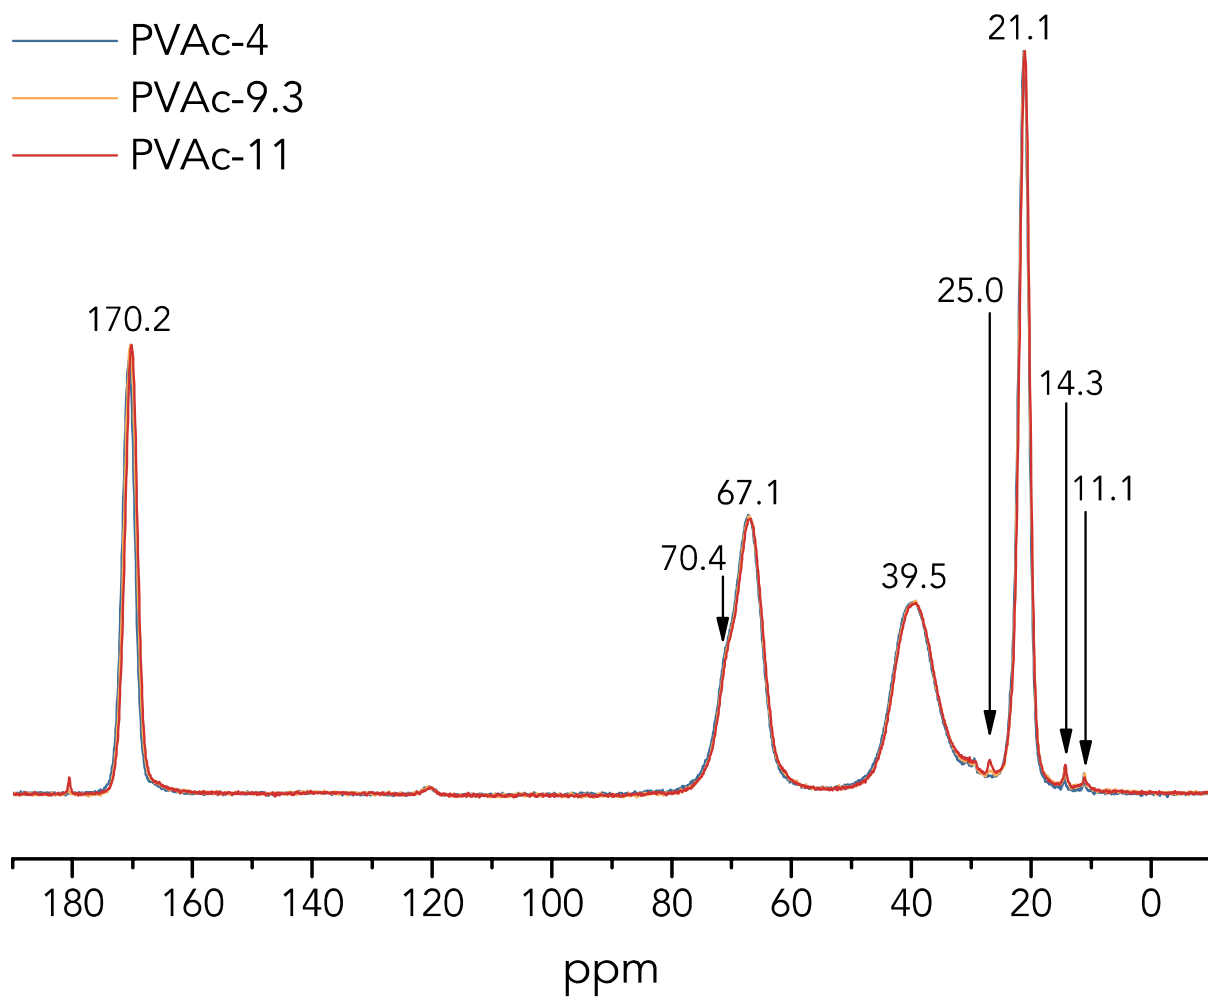

**Fig. S3** Solid-state 100.64  $^{13}\text{C}$  CP-MAS NMR spectra of the native PVAc samples prepared in different pH conditions.

**Table S1** Toughness of all samples characterized by tensile testing in this study.

| Sample coding | Toughness (J/m <sup>3</sup> ) |
|---------------|-------------------------------|
| PVAc-4        | $1.96 \times 10^7$            |
| X0.5PVAc-4    | $2.05 \times 10^7$            |
| X1PVAc-4      | $1.64 \times 10^7$            |
| X1.5PVAc-4    | $1.28 \times 10^7$            |
| X2PVAc-4      | $0.82 \times 10^7$            |
| X3PVAc-4      | $1.31 \times 10^7$            |
| PVAc-9.3      | $1.75 \times 10^7$            |
| X0.5PVAc-9.3  | $1.82 \times 10^7$            |
| X1PVAc-9.3    | $1.15 \times 10^7$            |
| X1.5PVAc-9.3  | $1.40 \times 10^7$            |
| X2PVAc-9.3    | $1.63 \times 10^7$            |
| X3PVAc-9.3    | $2.19 \times 10^7$            |
| PVAc-11       | $1.61 \times 10^7$            |
| X0.5PVAc-11   | $1.47 \times 10^7$            |
| X1PVAc-11     | $1.44 \times 10^7$            |
| X1.5PVAc-11   | $1.34 \times 10^7$            |
| X2PVAc-11     | $0.21 \times 10^7$            |
| X3PVAc-11     | $0.36 \times 10^7$            |
